# Supplementary material
Source: PubMed Central journal article supplement (PMC5068161)
Supplement: AEM.01457-16_zam999117460so1.pdf [file AEM.01457-16_zam999117460so1.pdf]

## Supporting information

### Light-controlled cell factories – Employing photocaged IPTG for light-mediated optimization of *lac*-based gene expression and (+)-valencene biosynthesis in *Corynebacterium glutamicum*

Dennis Binder,<sup>1§</sup> Jonas Frohwitter,<sup>2§</sup> Regina Mahr,<sup>3</sup> Claus Bier<sup>4</sup>, Alexander Grünberger,<sup>3</sup> Anita Loeschcke,<sup>1</sup> Petra Peters-Wendisch,<sup>2</sup> Dietrich Kohlheyer,<sup>3</sup> Jörg Pietruszka,<sup>3,4</sup> Julia Frunzke,<sup>3</sup> Karl-Erich Jaeger,<sup>1,3</sup> Volker F. Wendisch<sup>2\*</sup> and Thomas Drepper<sup>1\*</sup>

#### DNA-Sequence of the synthetic codon-usage optimized CnVS gene (oCnVS):

**ATGGCGGAAATGTTCAACGGCAACAGCAGCAACGATGGCAGCAGCTGCATGCCGGTGAAAGATGCGCTGC**  
GCCGCACCGGCAACCATCATCCGAACCTGTGGACCGATGATTCATCCAGAGCCTGAACAGCCCCGTATAGC  
GATAGCAGCTATCATAAACATCGCGAAATCCTGATCGATGAAATCCGCGATATGTTTCAGCAACGGCGAAGGC  
GATGAATTCGGCGTGCTGGAAAACATCTGGTTCGTGGATGTGGTGCAGCGCCTGGGCATCGATCGCCATTT  
CCAGGAAGAAATCAAACCGCGCTGGATTATATCTATAAATTCTGGAACCATGATAGCATCTTCGGCGATCTG  
AACATGGTGGCGCTGGGCTTCCGCATCCTGCGCCTGAACCGCTATGTGGCGAGCAGCGATGTGTTCAAAAA  
ATTCAAAGGCGAAGAAGGCCAGTTCAGCGGCTTCGAAAGCAGCGATCAGGATGCGAAACTGGAAATGATGC  
TGAACCTGTATAAAGCGAGCGAACTGGATTTCCCGGATGAAGATATCCTGAAAGAAGCGCGCGCTTCGCG  
AGCATGTATCTGAAACATGTGATCAAAGAATATGGCGATATCCAGGAAAGCAAAAACCCGCTGCTGATGGAA  
ATCGAATATACCTTCAAATATCCGTGGCGCTGCCGCTGCCGCGCCTGGAAGCGTGGAACCTTCATCCATATC  
ATGCGCCAGCAGGATTGCAACATCAGCCTGGCGAACAACCTGTATAAAATCCCGAAAATCTATATGAAAAAA  
TCCTGGAACCTGGCGATCCTGGATTTCAACATCCTGCAAAGCCAGCATCAGCATGAAATGAACTGATCAGCA  
CCTGGTGGAAAAACAGCAGCGGATCCAGCTGGATTTCTTCCGCCATCGCCATATCGAAAGCTATTTCTGGT  
GGGCGAGCCCGCTGTTCGAACCGGAATTCAGCACCTGCCGCATCAACTGCACCAAATGAGCACCAAAATG  
TTCCTGCTGGATGATATCTATGATACCTATGGCACCGTGGAAGAACTGAAACCGTTCACCACCACCCTGACC  
CGCTGGGATGTGAGCACCGTGGATAACCATCCGATTATATGAAAATCGCGTTCAACTTCAGCTATGAAATCT  
ATAAAGAAATCGCGAGCGAAGCGGAACGCAAACATGGCCCGTTCGTGTATAAATATCTGCAAAGCTGCTGGA  
AAAGCTATATCGAAGCGTATATGCAGGAAGCGGAATGGATCGCGAGCAACCATATTCCGGGCTTCGATGAAT  
ATCTGATGAACGGCGTGAAAAGCAGCGGCATGCGCATCCTGATGATCCATGCGCTGATCCTGATGGATAACC  
CCGCTGAGCGATGAAATCCTGGAACAGCTGGATATCCCGAGCAGCAAAAGCCAGGCGCTGCTGAGCCTGAT  
CACCCGCTGGTGGATGATGTGAAAGATTTTGAAGATGAACAGGCGCATGGCGAAATGGCGAGCAGCATCG  
AATGCTATATGAAAGATAACCATGGCAGCACCCGCGAAGATGCGCTGAACTATCTGAAAATCCGCATCGAAA

GCTGCGTG CAGGA ACTGAACAAAGAACTGCTGGAACCGAGCAACATGCATGGCAGCTTCCGCAACCTGTAT  
 CTGAACGTGGGCATGCGCGTGATCTTCTTCATGCTGAACGATGGCGATCTGTTACCCATAGCAACCGCAA  
 GAAATCCAGGATGCGATCACCAAATTCTTCGTGGAACCGATCATCCCGTAA

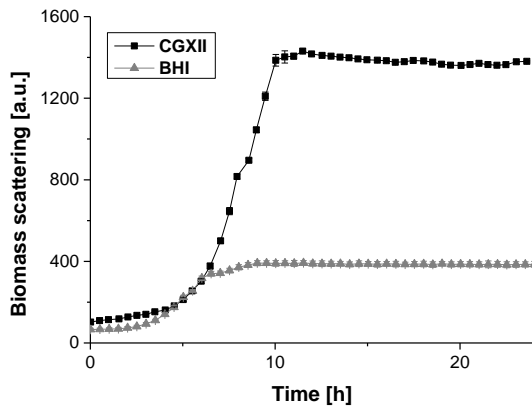

**FIG S1** Growth curves of *C. glutamicum* cultures in triplicates in BHI complex (grey triangles) and CGXII minimal medium (black squares).

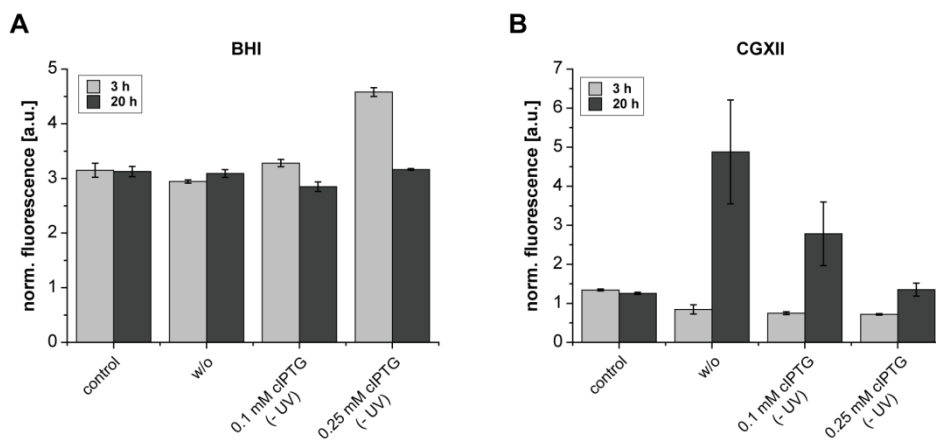

**FIG S2** Basal expression background of cIPTG supplemented cultures in BHI (A) and CGXII medium (B) in the dark. Normalized fluorescence values originate from biomass-normalized triplicates analog to values for induced gene expression depicted in Fig. 2B,D. Control: Wildtype control strain without the pEKEx-2-EYFP plasmid.

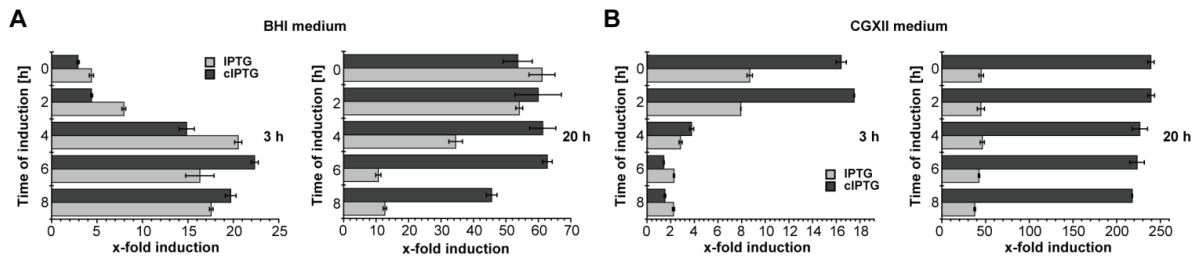

**FIG S3** Dynamic range of induction for IPTG (light grey) and cIPTG-based (dark grey) induction after 3 (left) and 20 h (right) of expression in BHI (**A**) and CGXII medium (**B**) using *C. glutamicum* ATCC13032 (pEKEx-2-EYFP). Calculations originate from data depicted in Fig.2 B,C (biomass-normalized fluorescence) and Fig.S2 (basal fluorescence levels).

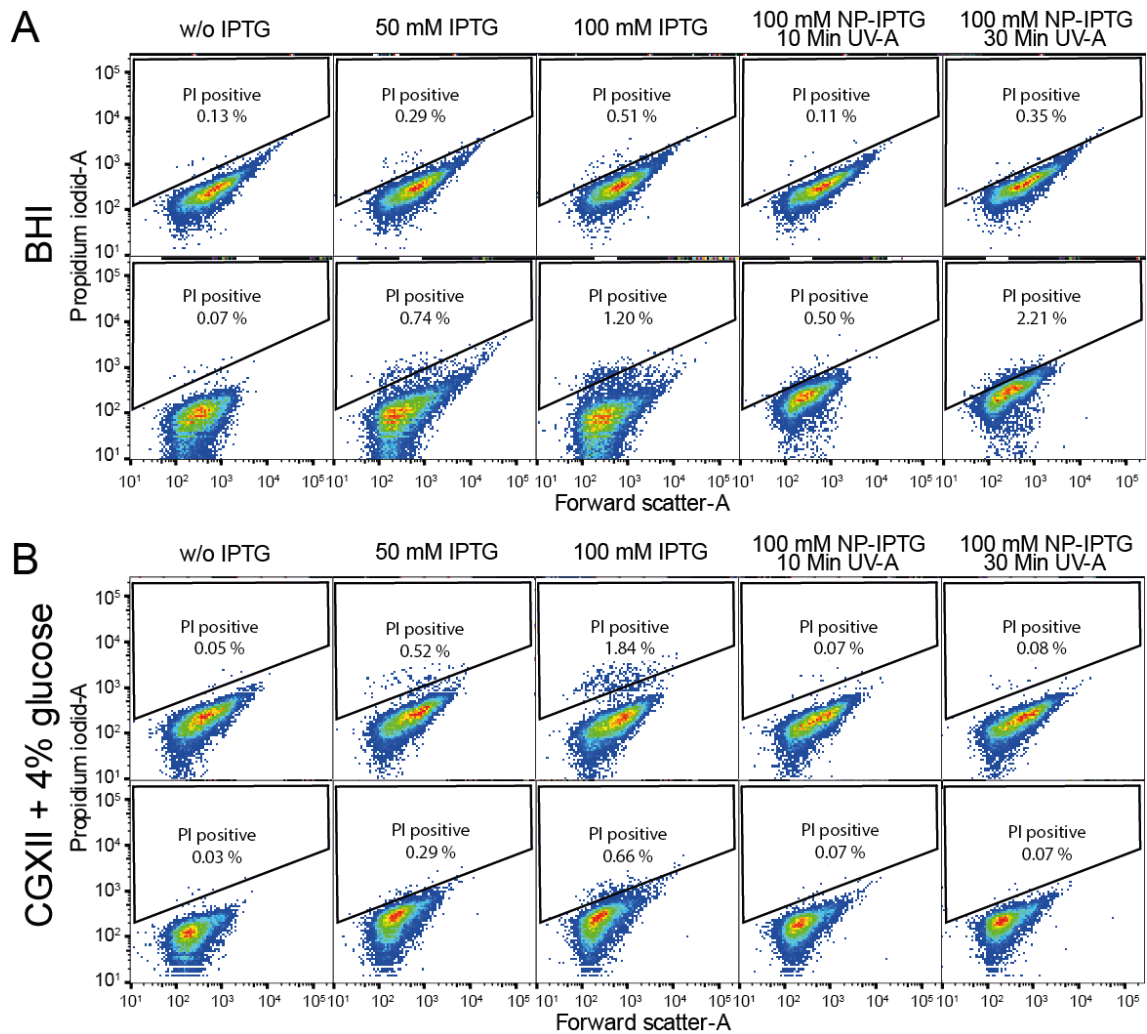

**FIG S4** Propidium iodide-based live-dead-staining using flow cytometric single-cell analysis to evaluate cell viability.

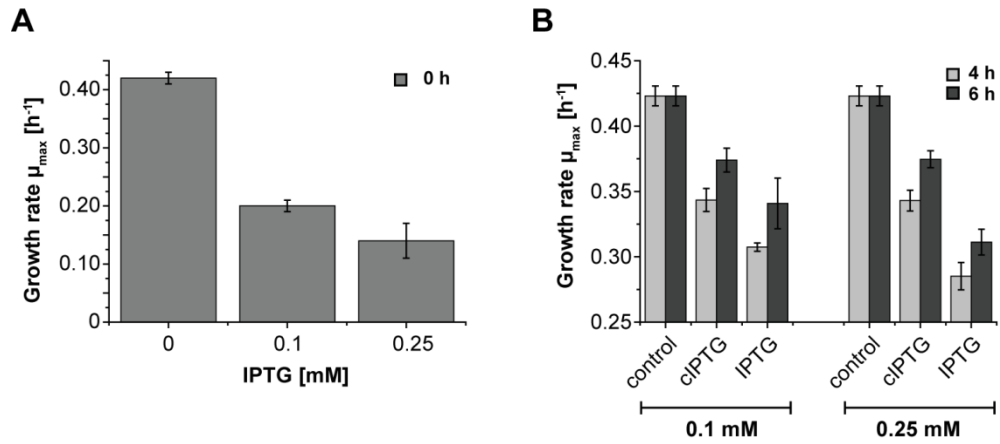

**FIG S5** Reduction of growth impairment during (+)-valencene production in VLC6 *via* delayed induction and application of ciPTG-based light induction. **A)** Growth rates of VLC6 cultures for direct induction (0 h) are depicted for different IPTG inducer concentrations. **B)** Growth rates of VLC6 cultures are shown for delayed IPTG and ciPTG-induction after 4 (light grey) and 6 h (dark grey) together with un-induced cultures (control). All means and standard deviation derive from biological triplicates.

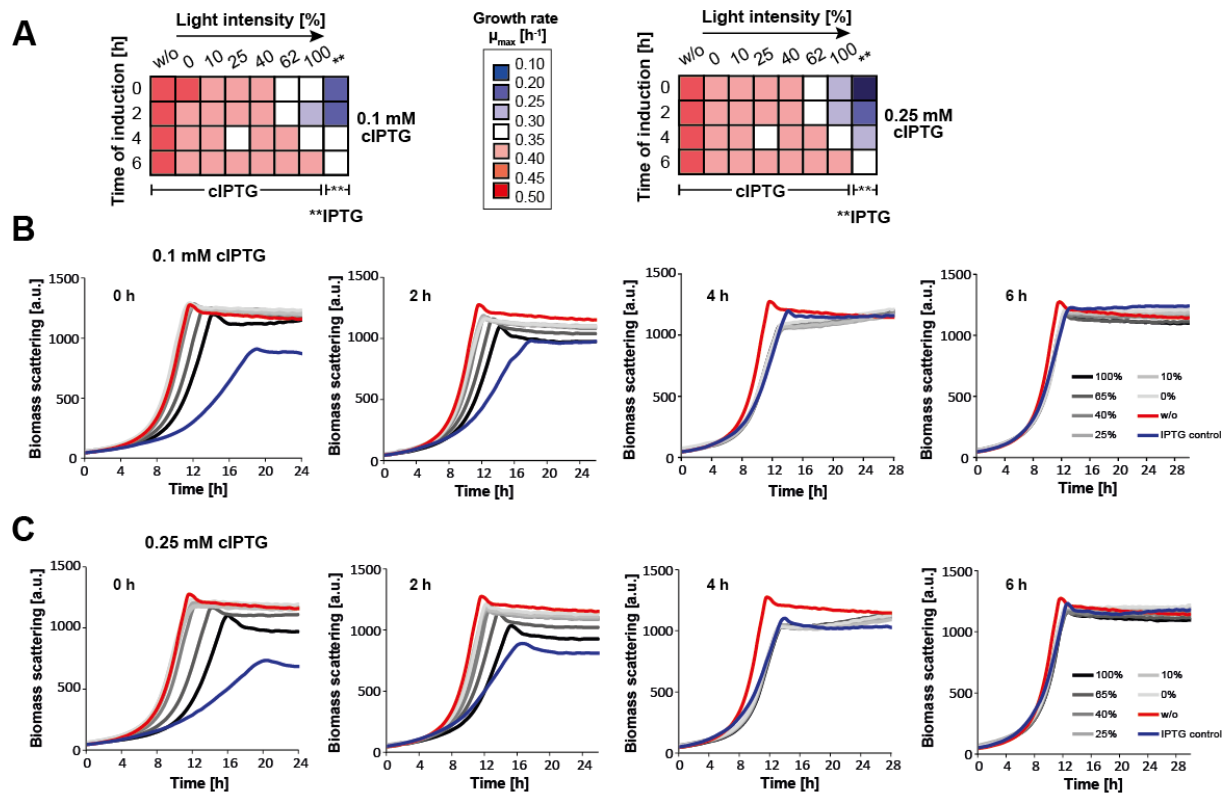

**FIG S6** Growth analysis of *C. glutamicum* VLC6 during IPTG- and cIPTG-induced (+)-valencene production for different induction time points. **(A)** Maximum growth rate  $\mu_{\max}$  intervals from low (blue) to high (red) in  $\text{h}^{-1}$  after 24 h of production using different times of induction as well as different (c)IPTG concentrations (0.1 and 0.25 mM). **(B)** Growth curves of (+)-valencene production cultures supplemented with 0.1 mM (c)IPTG. Light induction (grey to black curves) is compared to IPTG induction (blue curve) after 0, 2, 4 and 6 h of cultivation and plotted against uninduced control cultures (w/o, red curve). **(C)** Growth curves of (+)-valencene production cultures analogous to Fig. S6 B supplemented with 0.25 mM (c)IPTG. All averaged data originate from at least three independent biological triplicates.

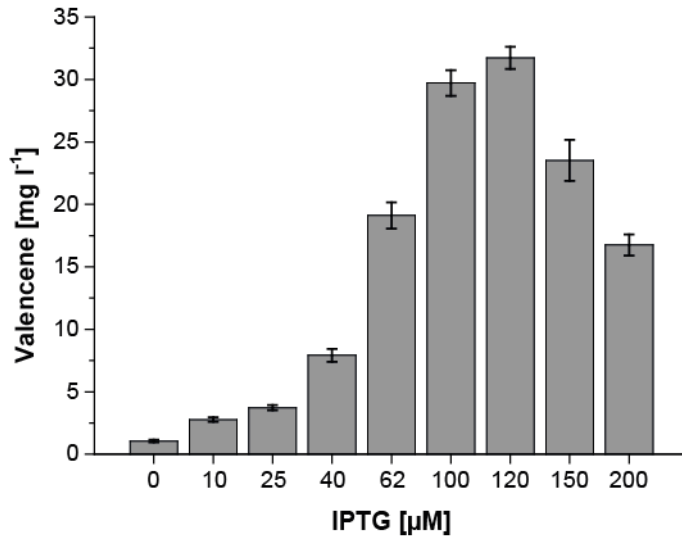

**FIG S7** Optimization of IPTG concentrations for *C. glutamicum* VLC6 production cultures induced after 4 h of cultivation. All averaged data originate from at least three independent biological triplicates. Error bars indicate the respective standard deviations.

**TAB S1** Summary of titers as well as volumetric and biomass-specific productivities for the conducted (+)-valencene productions in different *C. glutamicum* strains using CGXII minimal medium. Values for volumetric productivity were calculated using the overall cultivation times (28 h for induction after 4 h and 30 h for induction after 6 h).

| Strain | Condition                                                | Titer [mg l <sup>-1</sup> ] | Final OD <sub>600</sub> | Volumetric productivity [μg l <sup>-1</sup> h <sup>-1</sup> ] | Biomass-specific productivity [μg g CDW <sup>-1</sup> h <sup>-1</sup> ] |
|--------|----------------------------------------------------------|-----------------------------|-------------------------|---------------------------------------------------------------|-------------------------------------------------------------------------|
| VLC3   | 0.1 mM IPTG, 6h, Flask                                   | 7.2±0.6                     | 33.5±2.1                | 240 ± 20                                                      | 29 ± 2                                                                  |
| VLC4   | 0.1 mM IPTG, 6h, Flask                                   | 10.8±1.1                    | 34.1±1.8                | 360 ± 37                                                      | 42 ± 4                                                                  |
| VLC5   | 0.1 mM IPTG, 6h, Flask                                   | 10.5±3.5                    | 33.9±2.3                | 350 ± 117                                                     | 41 ± 14                                                                 |
| VLC6   | 0.1 mM IPTG, 6h, Flask                                   | 27.1±0.6                    | 35.2±1.1                | 903 ± 20                                                      | 103 ± 2                                                                 |
| VLC6   | 0.1 mM IPTG, 6h, Flowerplate                             | 29.0±0.1                    | 59.7±3.4                | 967 ± 3                                                       | 65 ± 0                                                                  |
| VLC6   | 0.1 mM IPTG, 4h, Flask                                   | 14.8±1.1                    | 30.3±1.2                | 529 ± 39                                                      | 70 ± 5                                                                  |
| VLC6   | 0.1 mM IPTG, 4h, Flowerplate                             | 28.4±1.7                    | 57.8±2.9                | 1014 ± 61                                                     | 70 ± 4                                                                  |
| VLC6   | 0.1 mM cIPTG, full light induction after 4h, Flowerplate | 41.0±0.7                    | 60.8±1.9                | 1464 ± 25                                                     | 96 ± 2                                                                  |
